# Supplementary material for: A conceptual-model-based sediment connectivity assessment for patchy agricultural catchments
Source: Copernicus journal article supplement (doi:10.5194/hess-26-3753-2022), 2022-07-18
Supplement: Supplementary file 1 [file hess-26-3753-2022-supplement.pdf]

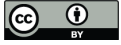

*Supplement of*

## **A conceptual-model-based sediment connectivity assessment for patchy agricultural catchments**

**Pedro V. G. Batista et al.**

*Correspondence to:* Pedro V. G. Batista ([pedro.batista@geo.uni-augsburg.de](mailto:pedro.batista@geo.uni-augsburg.de))

The copyright of individual parts of the supplement might differ from the article licence.

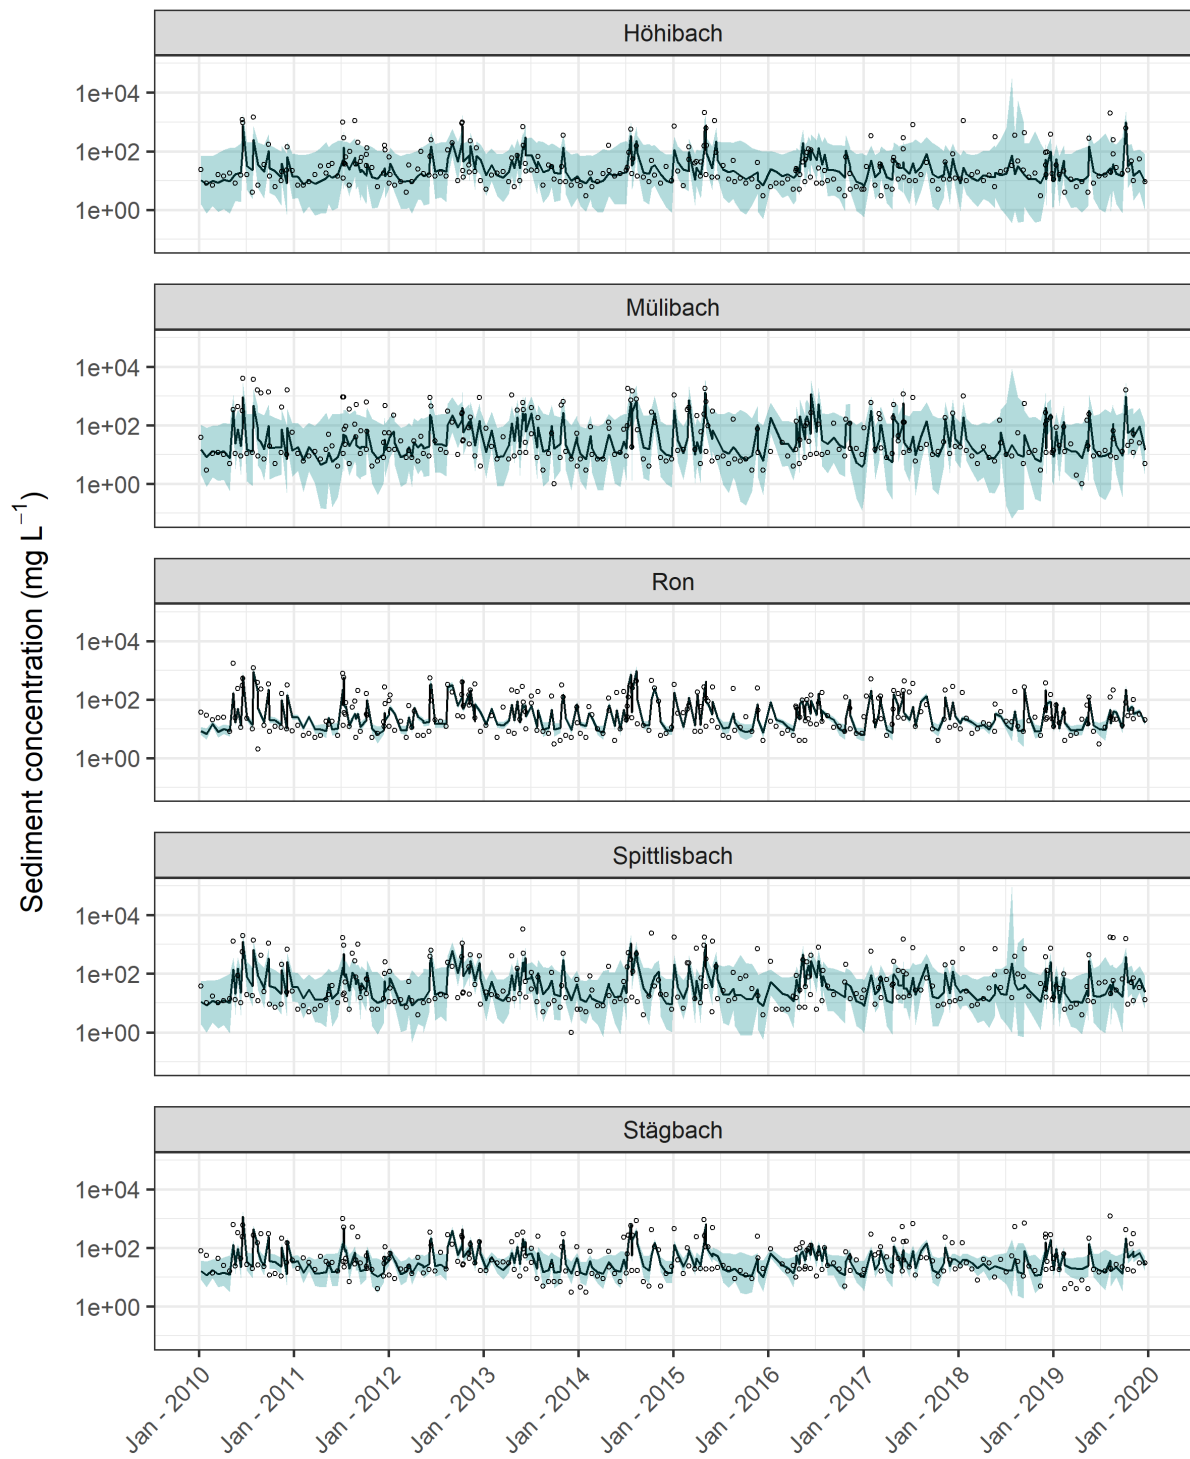

Figure S1. Log-scaled daily sediment concentrations calculated with the sediment rating curves: the dark solid line is the median of the realisations and the shaded area in light blue colour represents the 95 % prediction interval. Open circles are the observed sediment concentration values.

Table S1. Land cover and physiographic characteristics of the analysed sub-catchments draining into the Lake Baldegg.

| Attribute                             |                | Sub-catchment |          |     |              |           |
|---------------------------------------|----------------|---------------|----------|-----|--------------|-----------|
|                                       |                | Höhibach      | Mülibach | Ron | Spitllisbach | Stägibach |
| Land cover (%)                        | Arable land    | 72            | 56       | 71  | 52           | 76        |
|                                       | Forest         | 13            | 40       | 12  | 25           | 8         |
|                                       | Infrastructure | 4             | 3        | 12  | 11           | 10        |
|                                       | Orchards       | 11            | 1        | 4   | 12           | 6         |
|                                       | Other*         | 0             | 0        | 1   | 0            | 0         |
| Road density (km km <sup>-2</sup> )   |                | 5.9           | 6.0      | 6.9 | 8.4          | 6.7       |
| Stream density (km km <sup>-2</sup> ) |                | 2.0           | 3.0      | 1.9 | 3.0          | 1.2       |
| Mean elevation (m a. s. l.)           |                | 617           | 708      | 568 | 634          | 545       |
| Mean slope (%)                        |                | 12            | 16       | 9   | 12           | 9         |

\* Water surfaces and rock outcrops.
